# Supplementary material
Source: Elsevier journal article supplement (https://comptes-rendus.academie-sciences.fr/geoscience/article/10.1016/j.crte.2016.08.004/file/attach/mmc1.pdf)
Supplement: mmc1 [file mmc1.pdf]

# Supplementary Material

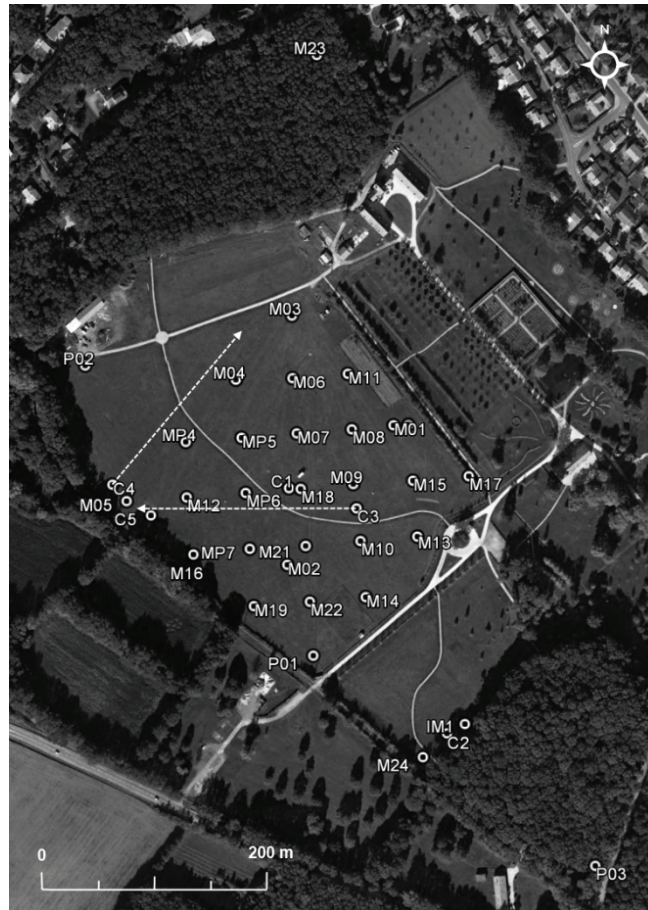

Fig. 1: The location of the wells at the HES (Google Earth v 7.1.2.2041, imagery date: October 30, 2012). The wells IM1 and C2 intercept the lower- and middle-Lias aquifer whereas the 35 other wells intercept the Dogger aquifer. The dotted lines indicate the direction of the two oblique cored wells C3 and C4.

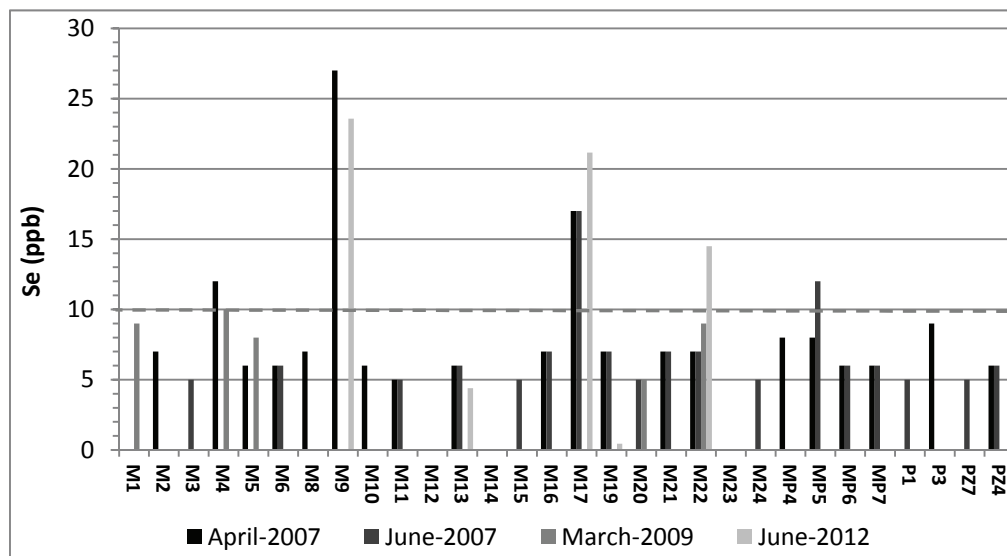

Fig. 2: Se concentrations measured in HES wells

Table 1 : Total rock analysis (A)

|         | Se     | SiO2  | Al2O3 | SiO2 + Al2O3 | H2Otot | CaO   | MgO   | CO2   | CaO + CO2 | CaO + MgO + CO2 | Fe2O3 | FeO   | S tot | C org | MnO  | Na2O | K2O   | Li     | Cs    | Rb     |
|---------|--------|-------|-------|--------------|--------|-------|-------|-------|-----------|-----------------|-------|-------|-------|-------|------|------|-------|--------|-------|--------|
|         | ppm    | %     | %     | %            | %      | %     | %     | %     | %         | %               | %     | %     | %     | %     | %    | %    | %     | ppm    | ppm   | ppm    |
| C4 Qu1  | 0.18   | 51.61 | 10.01 | 61.62        | 13.20  | 0.70  | 0.96  | 0.02  | 0.72      | 1.69            | 23.05 | <0.05 | <0.01 | <0.01 | 0.04 | <LD  | 0.40  | 50.00  | 9.35  | 73.51  |
| C4 Qu2  | 0.05   | 66.74 | 12.57 | 79.31        | 13.74  | 0.87  | 1.31  | 0.01  | 0.88      | 2.19            | 3.51  | <0.05 | <0.01 | <0.01 | 0.03 | <LD  | 1.08  | 58.00  | 18.80 | 187.90 |
| C4 Qu3  | 1.72   | 53.77 | 15.16 | 68.93        | 12.66  | 0.52  | 0.62  | 0.01  | 0.53      | 1.15            | 12.30 | **    | <0.01 | <0.01 | 3.19 | <LD  | 0.37  | 85.00  | 8.11  | 49.37  |
| C4 Bt1  | 0.07   | 0.40  | 0.07  | 0.47         | 0.24   | 55.84 | 0.39  | 42.21 | 98.05     | 98.44           | 0.06  | <0.05 | 0.03  | 0.03  | 0.02 | <LD  | <LD   | 1.00   | <LD   | 0.68   |
| C4 Bt2  | 0.28   | 2.23  | 0.20  | 2.43         | 0.43   | 54.73 | 0.42  | 43.13 | 97.86     | 98.28           | 0.28  | 0.07  | 0.02  | 0.03  | 0.04 | <LD  | <LD   | 1.70   | 0.17  | 2.07   |
| C4 Bt3  | 0.03   | 1.19  | 0.30  | 1.49         | 0.65   | 55.25 | 0.46  | 43.37 | 98.62     | 99.08           | 0.11  | 0.07  | 0.01  | 0.02  | 0.03 | <LD  | <LD   | 1.60   | 0.22  | 2.54   |
| C4 Bt4  | 0.05   | 0.78  | 0.13  | 0.91         | 0.36   | 55.91 | 0.44  | 43.58 | 99.49     | 99.93           | 0.12  | 0.05  | 0.03  | 0.04  | 0.02 | <LD  | <LD   | 1.40   | 0.12  | 1.37   |
| C4 Bt5  | 0.21   | 0.71  | 0.09  | 0.80         | 0.36   | 56.00 | 0.44  | 43.68 | 99.68     | 100.12          | 0.15  | <0.05 | 0.02  | 0.04  | 0.02 | <LD  | <LD   | 1.10   | <LD   | 0.92   |
| C4 Bt6  | 0.07   | 0.17  | 0.15  | 0.32         | 0.42   | 56.10 | 0.53  | 42.71 | 98.81     | 99.34           | 0.07  | <0.05 | 0.03  | 0.05  | 0.02 | <LD  | <LD   | 1.30   | 0.11  | 1.43   |
| C4 Bt1  | 0.11   | 0.06  | 0.08  | 0.13         | 0.35   | 56.25 | 0.43  | 44.31 | 100.56    | 100.99          | 0.27  | 0.03  | 0.03  | 0.04  | 0.02 | <LD  | <LD   | 1.00   | <LD   | 0.67   |
| C4 Bt2  | 28.00  | 0.07  | 0.13  | 0.20         | 0.47   | 55.61 | 0.51  | 44.27 | 99.88     | 100.39          | 0.28  | 0.14  | 0.07  | 0.06  | 0.03 | <LD  | <LD   | 0.90   | 0.10  | 0.94   |
| C4 Bt3  | 153.00 | 59.99 | 16.09 | 76.08        | 7.75   | 6.42  | 0.38  | 8.15  | 14.57     | 14.95           | 1.44  | 0.53  | 0.34  | 0.91  | 0.01 | 0.08 | 88.00 | 4.04   | 37.55 |        |
| C4 Bt4  | 0.19   | 0.58  | 0.35  | 0.93         | 0.65   | 54.71 | 0.44  | 44.03 | 98.74     | 99.18           | 0.72  | 0.10  | 0.02  | 0.03  | 0.03 | <LD  | 0.06  | 1.70   | 0.35  | 3.10   |
| C4 Bt5  | 0.14   | 0.59  | 0.34  | 0.93         | 0.57   | 54.85 | 0.55  | 43.91 | 98.76     | 99.30           | 0.42  | 0.11  | 0.23  | 0.07  | 0.01 | <LD  | 0.07  | 1.60   | 0.32  | 3.32   |
| C4 Bt6  | 6.40   | 1.38  | 0.65  | 2.03         | 0.81   | 53.96 | 0.65  | 43.55 | 97.51     | 98.16           | 0.67  | 0.09  | 0.04  | 0.06  | 0.01 | <LD  | 0.13  | 2.20   | 0.80  | 6.53   |
| C4 Bt7  | 8.10   | 33.02 | 24.23 | 57.25        | 12.20  | 14.44 | 0.45  | 13.24 | 27.68     | 28.13           | 1.03  | 0.46  | 0.13  | 0.57  | 0.01 | <LD  | 0.11  | 181.00 | 2.05  | 6.87   |
| C4 Bt8  | 10.50  | 0.83  | 0.42  | 1.26         | 0.64   | 54.70 | 0.59  | 43.84 | 98.54     | 99.13           | 0.66  | 0.10  | 0.04  | 0.04  | 0.01 | <LD  | 0.10  | 1.80   | 0.39  | 4.49   |
| C4 Bt9  | 0.11   | 2.41  | 0.63  | 3.04         | 0.89   | 52.58 | 0.57  | 42.43 | 95.01     | 95.58           | 0.78  | 0.20  | 0.36  | 0.09  | 0.03 | <LD  | 0.15  | 2.60   | 0.79  | 7.62   |
| C4 Bt10 | 6.10   | 25.10 | 9.37  | 34.47        | 7.71   | 15.90 | 0.48  | 11.15 | 27.05     | 27.53           | 17.32 | 1.86  | 13.17 | 0.73  | 0.01 | <LD  | 0.45  | 42.00  | 3.84  | 24.49  |
| C4 Bt12 | 3.80   | 13.85 | 7.81  | 21.66        | 8.22   | 32.02 | 0.80  | 29.74 | 61.76     | 62.56           | 4.84  | 1.42  | 3.72  | 1.08  | 0.02 | <LD  | 0.68  | 31.00  | 5.27  | 36.13  |
| C4 Bt13 | 495.00 | 34.26 | 21.86 | 56.12        | 15.63  | 4.17  | 0.99  | 8.46  | 12.63     | 13.62           | 10.06 | 2.52  | 7.26  | 1.22  | 0.01 | 0.09 | 1.24  | 109.00 | 12.12 | 66.11  |
| C4 Bt14 | 0.05   | 0.83  | 0.48  | 1.31         | 0.63   | 54.37 | 0.50  | 44.02 | 98.39     | 98.89           | 0.58  | 0.15  | 0.02  | 0.04  | 0.03 | <LD  | 0.08  | 1.90   | 0.38  | 3.90   |
| C4 Bt15 | 0.14   | 4.12  | 1.07  | 5.19         | 1.26   | 51.56 | 0.58  | 41.37 | 92.93     | 93.51           | 1.50  | 0.20  | 0.03  | 0.04  | 0.03 | <LD  | 0.29  | 4.40   | 1.91  | 13.13  |
| C4 Bt16 | 0.12   | 1.91  | 0.54  | 2.45         | 0.75   | 35.89 | 14.76 | 45.28 | 81.17     | 95.94           | 1.13  | 0.61  | 0.36  | 0.10  | 0.03 | <LD  | 0.14  | 4.00   | 0.75  | 5.53   |
| C4 Aa1  | 0.04   | 2.35  | 0.55  | 2.90         | 0.74   | 52.45 | 1.79  | 43.05 | 95.50     | 97.29           | 0.59  | 0.22  | 0.17  | 0.07  | 0.01 | <LD  | 0.20  | 2.70   | 0.88  | 6.44   |
| C4 Aa2  | 0.17   | 2.86  | 0.60  | 3.46         | 0.86   | 43.59 | 7.86  | 43.06 | 86.65     | 94.51           | 1.33  | 0.42  | 0.65  | 0.12  | 0.02 | <LD  | 0.21  | 4.30   | 0.86  | 6.22   |
| C4 Aa3  | 0.09   | 6.96  | 1.02  | 7.97         | 1.12   | 30.45 | 17.16 | 42.85 | 73.30     | 90.46           | 1.90  | 0.54  | 0.53  | 0.13  | 0.01 | <LD  | 0.37  | 7.80   | 1.13  | 10.14  |
| C4 Aa4  | 0.12   | 12.64 | 2.38  | 15.01        | 1.37   | 40.54 | 3.94  | 36.96 | 77.50     | 81.44           | 1.93  | 0.31  | 1.11  | 0.27  | 0.01 | <LD  | 1.12  | 11.50  | 3.40  | 27.43  |
| C5 Bt1  | 1.70   | 15.57 | 12.00 | 27.57        | 34.18  | 0.35  |       |       |           |                 | 0.87  |       |       | 2.94  | 0.03 | 0.02 | 0.05  |        | 0.817 | 3.009  |
| C5 Bt2  | 2.10   | 39.49 | 29.23 | 68.72        | 1.22   | 1.22  | 0.31  |       |           |                 | 1.71  |       |       | 7.51  | 0.00 | 0.03 | 0.06  |        | 1.319 | 4.195  |

Table 1 : Total rock analysis (B)

|               | As            | B          | Ba     | Be    | Bi    | Cd    | Cl   | Co    | Cr     | Cs    | Cu    | Ga    | Ge    | Hg  | HF    | In    | Mo    | Nb    | Ni     | Pb     | Rb     | Sb    | Sn     | Sr     | Ta    | V      | W     | Zn     |
|---------------|---------------|------------|--------|-------|-------|-------|------|-------|--------|-------|-------|-------|-------|-----|-------|-------|-------|-------|--------|--------|--------|-------|--------|--------|-------|--------|-------|--------|
|               | ppm           | ppm        | ppm    | ppm   | ppm   | ppm   | ppm  | ppm   | ppm    | ppm   | ppm   | ppm   | ppm   | ppb | ppm   | ppm   | ppm   | ppm   | ppm    | ppm    | ppm    | ppm   | ppm    | ppm    | ppm   | ppm    | ppm   | ppm    |
| <b>C4 Qu1</b> | 60.92         | 42         | 59.32  | 16.90 | 0.46  | 0.43  | 40   | 35.30 | 49.06  | 9.35  | 21.24 | 15.49 | 1.64  | 18  | 7.21  | 0.09  | 17.32 | 12.92 | 53.94  | 19.11  | 73.51  | 3.81  | 4.61   | 18.25  | 1.35  | 300.20 | 6.32  | 193.90 |
| <b>C4 Qu2</b> | 10.27         | 58         | 110.90 | 7.59  | 0.64  | 0.35  | 33   | 23.07 | 66.28  | 18.80 | 15.76 | 18.73 | 1.92  | 60  | 8.77  | 0.10  | 0.99  | 16.34 | 54.26  | 21.52  | 187.90 | 1.53  | 6.06   | 23.20  | 1.67  | 82.07  | 5.41  | 89.29  |
| <b>C4 Qu3</b> | <b>168.60</b> | <b>33</b>  | 4.01   | 24.12 | 0.65  | 21.69 | 33   | 97.28 | 106.00 | 8.11  | 28.53 | 23.63 | 3.11  | 335 | 6.13  | 0.08  | 5.49  | 15.27 | 238.10 | 46.21  | 49.37  | 3.18  | 2.74   | 29.95  | 1.54  | 237.20 | 4.52  | 426.80 |
| <b>C4 B1</b>  | <LD           | 2          | 3.10   | 0.39  | <LD   | <LD   | 44   | 1.70  | 3.25   | <LD   | <LD   | 0.13  | <LD   | <10 | <LD   | <LD   | 0.09  | 12.16 | 1.05   | 0.68   | <LD    | <LD   | <LD    | 113.70 | 0.03  | 7.96   | 0.15  | <LD    |
| <b>C4 B2</b>  | 2.49          | 4          | 6.57   | 0.39  | <LD   | 0.41  | 49   | 4.07  | 7.44   | 0.17  | <LD   | 0.41  | <LD   | 24  | 0.08  | 0.42  | 0.42  | 25.68 | 75.68  | 2.07   | 0.13   | <LD   | 112.50 | 0.03   | 15.08 | 0.16   | <LD   |        |
| <b>C4 B3</b>  | <LD           | 3          | 5.11   | 0.44  | <LD   | <20   | <LD  | 1.50  | 11.91  | 0.22  | <LD   | 0.41  | 0.06  | 11  | 0.08  | <LD   | 0.44  | 0.57  | 11.85  | 16.13  | 2.54   | <LD   | <LD    | 92.97  | 0.04  | 13.69  | 0.27  | <LD    |
| <b>C4 B4</b>  | <LD           | 3          | 4.08   | 0.29  | <LD   | <LD   | 40   | 1.92  | 8.18   | 0.12  | <LD   | 0.22  | <LD   | <10 | 0.04  | <LD   | 0.53  | 0.19  | 14.64  | 8.77   | 1.37   | <LD   | 0.26   | 118.10 | 0.01  | 10.80  | <LD   | <LD    |
| <b>C4 B5</b>  | 4.10          | 3          | 3.56   | 0.27  | <LD   | <LD   | 46   | 1.99  | 7.26   | <LD   | <LD   | 0.14  | <LD   | <10 | <LD   | <LD   | 0.47  | 0.12  | 15.85  | 1.21   | 0.92   | <LD   | 0.60   | 137.20 | <LD   | 13.84  | <LD   | <LD    |
| <b>C4 B6</b>  | <LD           | 3          | 5.34   | 0.48  | <LD   | 0.82  | 71   | 1.68  | 8.55   | 0.11  | <LD   | 0.28  | <LD   | 86  | 0.06  | <LD   | 0.46  | 0.16  | 15.23  | 2.11   | 1.43   | <LD   | <LD    | 158.90 | 0.02  | 6.38   | <LD   | <LD    |
| <b>C4 B1</b>  | <LD           | 2          | 2.92   | 0.40  | <LD   | 0.21  | 68   | 1.90  | <LD    | <LD   | <LD   | 0.11  | <LD   | 28  | <LD   | <LD   | 0.50  | 0.09  | 13.58  | 2.27   | 0.67   | <LD   | 0.23   | 142.30 | <LD   | 11.30  | <LD   | <LD    |
| <b>C4 B2</b>  | 2.33          | 2          | 3.05   | 0.42  | <LD   | 0.25  | <20  | 2.29  | <LD    | 0.10  | <LD   | 0.16  | <LD   | <10 | 0.04  | <LD   | 0.68  | 0.13  | 14.84  | 5.32   | 0.94   | <LD   | <LD    | 50.54  | 0.01  | 6.84   | <LD   | <LD    |
| <b>C4 B3</b>  | 8.29          | <b>63</b>  | 178.50 | 6.15  | 0.42  | 14.09 | 46   | 10.43 | 111.40 | 4.04  | 7.76  | 18.65 | 2.26  | 14  | 11.53 | 0.08  | 1.75  | 25.36 | 42.09  | 17.58  | 37.55  | 2.21  | 7.05   | 39.08  | 2.52  | 130.00 | 7.08  | 256.00 |
| <b>C4 B4</b>  | 6.22          | 4          | 9.58   | 0.65  | <LD   | <LD   | 44   | 3.34  | 9.01   | 0.35  | 3.60  | 0.51  | 0.07  | <10 | 0.10  | <LD   | 0.50  | 0.43  | 20.33  | 4.14   | 3.10   | 0.31  | 0.39   | 114.00 | 0.03  | 19.23  | 0.18  | <LD    |
| <b>C4 B5</b>  | 5.23          | 5          | 6.24   | 0.32  | <LD   | 0.21  | 180  | 2.21  | 11.23  | 0.32  | 3.75  | 0.58  | 0.08  | <10 | 0.09  | <LD   | 0.84  | 0.39  | 15.73  | 4.49   | 3.32   | 0.18  | 0.38   | 152.80 | 0.03  | 10.17  | <LD   | 10.90  |
| <b>C4 B6</b>  | 3.98          | 8          | 12.17  | 0.51  | <LD   | 0.34  | 120  | 1.80  | 17.07  | 0.80  | <LD   | 1.07  | 0.12  | <10 | 0.21  | <LD   | 0.59  | 0.86  | 15.79  | 7.87   | 6.53   | 0.26  | 0.24   | 177.20 | 0.06  | 20.53  | 0.30  | 15.77  |
| <b>C4 B7</b>  | <b>14.04</b>  | <b>176</b> | 31.75  | 9.65  | 0.80  | 3.93  | 1075 | 30.46 | 210.70 | 2.05  | 17.38 | 26.50 | 3.06  | 19  | 40.11 | 0.11  | 1.26  | 55.17 | 157.30 | 35.62  | 6.87   | 2.41  | 13.42  | 56.29  | 5.77  | 155.80 | 16.52 | 96.51  |
| <b>C4 B8</b>  | <b>12.52</b>  | 9          | 8.62   | 0.40  | <LD   | 0.24  | 63   | 2.64  | 18.30  | 0.39  | <LD   | 0.71  | 0.07  | <10 | 0.16  | <LD   | 0.56  | 0.60  | 19.80  | 3.18   | 4.49   | 0.25  | <LD    | 154.10 | 0.04  | 20.05  | 0.20  | 12.30  |
| <b>C4 B9</b>  | 5.41          | 7          | 10.52  | 0.48  | <LD   | <LD   | 76   | 2.17  | 19.19  | 0.79  | <LD   | 0.93  | 0.12  | <10 | 0.25  | <LD   | 0.90  | 0.98  | 15.80  | 3.38   | 7.62   | 0.14  | 0.34   | 109.50 | 0.06  | 23.52  | 0.29  | 6.56   |
| <b>C4 B10</b> | <b>24.16</b>  | <b>45</b>  | 53.46  | 3.49  | <LD   | 0.35  | 37   | 11.05 | 88.21  | 3.84  | 18.46 | 11.16 | 1.34  | 24  | 5.66  | <LD   | 7.00  | 12.20 | 35.42  | 87.25  | 24.49  | 0.91  | 1.26   | 50.36  | 1.18  | 97.48  | 21.11 | 19.79  |
| <b>C4 B12</b> | <b>40.77</b>  | <b>38</b>  | 47.90  | 3.19  | <LD   | 0.84  | 62   | 13.45 | 100.50 | 5.27  | 19.38 | 10.37 | 1.09  | 41  | 2.11  | 0.07  | 8.86  | 8.45  | 66.13  | 19.08  | 36.13  | 1.49  | <LD    | 91.83  | 0.65  | 110.30 | 3.50  | 62.78  |
| <b>C4 B13</b> | <b>46.83</b>  | <b>62</b>  | 134.40 | 7.15  | 0.13  | 3.66  | 170  | 44.08 | 184.70 | 12.12 | 24.05 | 25.04 | 2.26  | 79  | 4.57  | 0.08  | 4.90  | 21.23 | 73.53  | 37.50  | 66.11  | 2.43  | 2.94   | 43.22  | 1.86  | 360.10 | 7.32  | 70.89  |
| <b>C4 B14</b> | 5.94          | 6          | 9.13   | 0.54  | <LD   | <LD   | 79   | 1.96  | 10.43  | 0.38  | 6.78  | 0.62  | 0.08  | 12  | 0.15  | <LD   | 0.60  | 0.56  | 13.91  | 7.29   | 3.90   | 0.14  | 0.74   | 143.80 | 0.04  | 21.53  | 0.21  | 6.35   |
| <b>C4 B15</b> | 6.11          | <b>15</b>  | 18.21  | 1.29  | <LD   | <LD   | 64   | 3.19  | 28.55  | 1.91  | <LD   | 1.67  | 0.20  | 20  | 0.40  | <LD   | 0.77  | 1.93  | 15.10  | 7.30   | 13.13  | 0.14  | 0.36   | 143.10 | 0.12  | 37.18  | 0.36  | 10.28  |
| <b>C4 B16</b> | <b>10.17</b>  | 9          | 7.90   | 0.39  | <LD   | <LD   | 135  | 1.48  | 17.25  | 0.75  | <LD   | 0.75  | 0.08  | <10 | 0.26  | <LD   | <LD   | 0.86  | 10.70  | 4.28   | 5.53   | 0.11  | 0.24   | 124.50 | 0.05  | 29.28  | <LD   | <LD    |
| <b>C4 Aa1</b> | <LD           | 8          | 10.06  | 0.21  | <LD   | <LD   | 89   | 1.33  | 17.05  | 0.88  | <LD   | 0.76  | 0.09  | <10 | 0.19  | <LD   | <LD   | 0.85  | 10.73  | 56.02  | 6.44   | <LD   | 0.34   | 159.10 | 0.05  | 13.63  | 0.19  | <LD    |
| <b>C4 Aa2</b> | <b>26.33</b>  | <b>12</b>  | 10.38  | <LD   | <LD   | <LD   | 86   | 1.56  | 20.28  | 0.86  | 8.82  | 0.85  | 0.10  | <10 | 0.66  | <LD   | 0.94  | 1.12  | 10.72  | 3.86   | 6.22   | 0.12  | 1.47   | 97.79  | 0.08  | 21.39  | <LD   | <LD    |
| <b>C4 Aa3</b> | 7.82          | 8          | 19.76  | 0.29  | <LD   | <LD   | 125  | 1.53  | 17.87  | 1.13  | 3.57  | 1.36  | 0.16  | <10 | 1.31  | <LD   | 0.65  | 1.45  | 9.58   | 731.71 | 10.14  | <LD   | 0.48   | 102.60 | 0.11  | 16.61  | 0.24  | 6.86   |
| <b>C4 Aa4</b> | <b>12.69</b>  | <b>23</b>  | 45.59  | 0.41  | <LD   | <LD   | 73   | 2.83  | 23.10  | 3.40  | 4.79  | 3.23  | 0.30  | <10 | 1.43  | <LD   | 4.76  | 2.94  | 15.18  | 6.68   | 27.43  | 0.21  | 0.60   | 187.70 | 0.24  | 22.18  | 0.35  | 8.79   |
| <b>C5 B1</b>  | 8.77          |            | 12.74  | 6.304 | 0.258 | 10.68 |      | 15.46 | 95.37  | 0.817 | 12.63 | 12.85 | 7.371 |     | 8.488 | <LD   | 27.58 | 18.54 | 43.02  | 28.642 | 3.009  | 0.669 | 3.282  | 74.36  | 1.547 | 87.88  | 4.754 | 382.8  |
| <b>C5 B2</b>  | <b>13.05</b>  |            | 22.19  | 20.84 | 0.48  | 7.403 |      | 33.41 | 211.6  | 1.319 | 18.62 | 32.48 | 8.876 |     | 17.72 | 0.144 | 74.28 | 41.69 | 78.56  | 58.919 | 4.195  | 1.01  | 6.451  | 22.4   | 3.467 | 155.6  | 8.999 | 246.3  |

Table 1: Total rock analysis (C)

|         | La     | Ce     | Pr    | Nd     | Sm    | Eu    | Gd    | Tb    | Dy    | Ho    | Er    | Tm   | Yb    | Lu   | REE     | Y      | REY     | Th    | U      | Zr      | TiO2 | P2O5 | F    |
|---------|--------|--------|-------|--------|-------|-------|-------|-------|-------|-------|-------|------|-------|------|---------|--------|---------|-------|--------|---------|------|------|------|
|         | ppm    | ppm    | ppm   | ppm    | ppm   | ppm   | ppm   | ppm   | ppm   | ppm   | ppm   | ppm  | ppm   | ppm  | ppm     | ppm    | ppm     | ppm   | ppm    | ppm     | %    | %    | %    |
| C4 Qu1  | 21.46  | 573.60 | 6.28  | 24.65  | 6.23  | 1.39  | 8.00  | 1.03  | 6.21  | 1.22  | 3.59  | 0.57 | 4.09  | 0.62 | 658.94  | 35.68  | 694.62  | 11.64 | 6.75   | 294.80  | 0.64 | 0.12 | 0.17 |
| C4 Qu2  | 31.90  | 124.10 | 8.01  | 28.12  | 5.52  | 1.03  | 4.23  | 0.66  | 3.97  | 0.76  | 2.27  | 0.37 | 2.72  | 0.41 | 214.07  | 20.29  | 234.36  | 14.91 | 4.39   | 337.90  | 0.76 | 0.03 | 0.18 |
| C4 Qu3  | 559.80 | 271.80 | 92.78 | 376.50 | 72.09 | 16.04 | 74.03 | 10.76 | 63.45 | 12.52 | 33.57 | 4.61 | 26.77 | 3.99 | 1618.71 | 498.90 | 2117.61 | 17.57 | 6.83   | 227.00  | 0.80 | 0.21 | 0.11 |
| C4 Bk1  | 8.76   | 3.35   | 1.07  | 4.28   | 0.76  | 0.18  | 0.88  | 0.13  | 0.78  | 0.17  | 0.48  | 0.06 | 0.35  | 0.06 | 21.31   | 11.05  | 32.36   | 0.16  | 2.78   | <LD     | <LD  | <LD  | 0.01 |
| C4 Bk2  | 13.56  | 6.89   | 1.92  | 7.70   | 1.48  | 0.34  | 1.61  | 0.23  | 1.43  | 0.30  | 0.78  | 0.10 | 0.58  | 0.08 | 36.99   | 16.82  | 53.81   | 0.46  | 1.46   | 3.45    | 0.01 | <LD  | 0.01 |
| C4 Bk3  | 17.47  | 7.64   | 2.49  | 10.15  | 1.99  | 0.49  | 2.36  | 0.35  | 2.20  | 0.46  | 1.19  | 0.15 | 0.85  | 0.13 | 47.91   | 23.85  | 71.76   | 0.59  | 3.79   | 2.89    | 0.02 | 0.06 | 0.02 |
| C4 Bk4  | 13.63  | 5.09   | 1.83  | 7.29   | 1.34  | 0.32  | 1.50  | 0.22  | 1.34  | 0.29  | 0.77  | 0.10 | 0.58  | 0.08 | 34.37   | 15.71  | 50.08   | 0.32  | 1.72   | <LD     | 0.01 | <LD  | 0.01 |
| C4 Bk5  | 8.02   | 3.57   | 0.99  | 4.07   | 0.73  | 0.17  | 0.86  | 0.13  | 0.81  | 0.18  | 0.48  | 0.06 | 0.38  | 0.06 | 20.51   | 10.82  | 31.33   | 0.27  | 2.33   | <LD     | 0.01 | 0.02 | 0.01 |
| C4 Bk6  | 13.55  | 9.64   | 2.34  | 11.00  | 2.71  | 0.73  | 4.18  | 0.66  | 4.47  | 1.00  | 2.65  | 0.33 | 1.85  | 0.26 | 55.37   | 46.08  | 101.45  | 0.31  | 1.40   | 1.78    | 0.01 | 0.02 | 0.01 |
| C4 Bk1  | 7.76   | 4.96   | 1.11  | 4.54   | 0.87  | 0.21  | 1.04  | 0.15  | 0.96  | 0.22  | 0.65  | 0.09 | 0.55  | 0.09 | 23.19   | 15.74  | 38.93   | 0.22  | 1.55   | <LD     | <LD  | <LD  | 0.01 |
| C4 Bk2  | 7.29   | 4.13   | 0.97  | 3.99   | 0.78  | 0.19  | 0.96  | 0.14  | 0.90  | 0.20  | 0.56  | 0.07 | 0.42  | 0.07 | 20.66   | 12.86  | 33.52   | 0.19  | 3.11   | <LD     | 0.01 | 0.04 | 0.01 |
| C4 Bk3  | 92.11  | 87.46  | 15.50 | 57.23  | 10.23 | 2.05  | 9.59  | 1.50  | 9.35  | 1.95  | 5.63  | 0.83 | 5.39  | 0.84 | 299.65  | 84.91  | 384.56  | 17.20 | 27.28  | 492.30  | 1.38 | 0.05 | 0.05 |
| C4 Bk4  | 12.26  | 6.68   | 1.73  | 7.01   | 1.31  | 0.32  | 1.40  | 0.21  | 1.39  | 0.29  | 0.82  | 0.11 | 0.65  | 0.10 | 34.26   | 15.75  | 50.01   | 0.66  | 1.54   | 3.40    | 0.02 | 0.02 | 0.01 |
| C4 Bk5  | 23.09  | 10.64  | 3.57  | 14.20  | 2.56  | 0.60  | 2.69  | 0.39  | 2.32  | 0.48  | 1.28  | 0.17 | 0.98  | 0.14 | 63.11   | 24.81  | 87.92   | 0.90  | 7.07   | 2.99    | 0.02 | <LD  | 0.01 |
| C4 Bk6  | 28.10  | 14.48  | 4.38  | 17.61  | 3.29  | 0.73  | 3.31  | 0.47  | 2.77  | 0.56  | 1.50  | 0.20 | 1.16  | 0.17 | 78.71   | 29.16  | 107.87  | 1.93  | 0.53   | 7.22    | 0.04 | 0.02 | 0.02 |
| C4 Bk7  | 285.20 | 235.10 | 44.82 | 171.50 | 30.28 | 6.02  | 27.24 | 4.00  | 24.73 | 5.19  | 15.15 | 2.22 | 14.57 | 2.31 | 868.33  | 273.80 | 1142.13 | 30.82 | 25.94  | 1525.00 | 2.61 | 0.08 | 0.05 |
| C4 Bk8  | 16.19  | 10.21  | 2.60  | 10.34  | 1.95  | 0.45  | 2.04  | 0.30  | 1.81  | 0.37  | 1.04  | 0.14 | 0.84  | 0.13 | 48.41   | 19.73  | 68.14   | 1.20  | 0.58   | 5.73    | 0.03 | <LD  | 0.01 |
| C4 Bk9  | 21.02  | 13.22  | 3.36  | 13.30  | 2.49  | 0.55  | 2.45  | 0.35  | 2.04  | 0.41  | 1.09  | 0.15 | 0.85  | 0.12 | 61.39   | 21.92  | 83.31   | 1.74  | 24.73  | 9.10    | 0.04 | 0.03 | 0.02 |
| C4 Bk10 | 86.71  | 89.94  | 15.70 | 60.31  | 10.94 | 2.18  | 9.50  | 1.30  | 7.57  | 1.47  | 4.05  | 0.59 | 3.59  | 0.54 | 294.39  | 67.20  | 361.59  | 11.00 | 12.58  | 219.20  | 0.61 | 0.12 | 0.07 |
| C4 Bk12 | 37.76  | 42.43  | 7.18  | 27.85  | 4.95  | 1.02  | 4.21  | 0.60  | 3.44  | 0.66  | 1.79  | 0.26 | 1.65  | 0.25 | 134.05  | 27.07  | 161.12  | 7.79  | 18.54  | 76.81   | 0.38 | 0.12 | 0.10 |
| C4 Bk13 | 106.50 | 130.80 | 20.84 | 77.93  | 14.34 | 2.87  | 11.83 | 1.62  | 8.93  | 1.60  | 4.19  | 0.60 | 3.75  | 0.56 | 386.35  | 65.19  | 451.54  | 19.93 | 36.09  | 168.50  | 0.95 | 0.30 | 0.19 |
| C4 Bk14 | 13.68  | 11.07  | 2.35  | 9.70   | 1.96  | 0.45  | 2.03  | 0.30  | 1.88  | 0.40  | 1.14  | 0.15 | 0.94  | 0.14 | 46.21   | 21.41  | 67.62   | 0.87  | 1.16   | 5.09    | 0.03 | <LD  | 0.02 |
| C4 Bk15 | 21.25  | 19.47  | 4.14  | 17.22  | 3.45  | 0.77  | 3.45  | 0.50  | 2.83  | 0.55  | 1.46  | 0.19 | 1.11  | 0.17 | 76.55   | 27.44  | 103.99  | 3.76  | 2.96   | 15.00   | 0.07 | 0.17 | 0.05 |
| C4 Bk16 | 11.81  | 14.24  | 2.45  | 9.93   | 2.02  | 0.46  | 1.92  | 0.28  | 1.51  | 0.29  | 0.75  | 0.10 | 0.61  | 0.09 | 46.45   | 11.69  | 58.14   | 1.45  | 3.25   | 9.72    | 0.04 | <LD  | 0.05 |
| C4 Aa1  | 8.87   | 12.99  | 2.05  | 8.24   | 1.74  | 0.38  | 1.58  | 0.23  | 1.22  | 0.23  | 0.60  | 0.08 | 0.51  | 0.08 | 38.79   | 8.59   | 47.38   | 1.90  | 2.82   | 6.95    | 0.04 | <LD  | 0.02 |
| C4 Aa2  | 12.72  | 19.09  | 3.06  | 12.65  | 2.37  | 0.50  | 1.93  | 0.28  | 1.50  | 0.26  | 0.72  | 0.10 | 0.62  | 0.09 | 55.89   | 9.30   | 65.19   | 2.21  | 3.00   | 26.26   | 0.05 | 0.04 | 0.03 |
| C4 Aa3  | 14.60  | 22.39  | 3.55  | 14.18  | 2.73  | 0.57  | 2.15  | 0.32  | 1.69  | 0.31  | 0.82  | 0.12 | 0.72  | 0.11 | 64.24   | 10.50  | 74.74   | 2.37  | 1.40   | 52.86   | 0.08 | 0.02 | 0.05 |
| C4 Aa4  | 14.92  | 23.78  | 3.62  | 14.28  | 2.59  | 0.54  | 2.09  | 0.31  | 1.72  | 0.31  | 0.85  | 0.12 | 0.79  | 0.12 | 66.05   | 9.91   | 75.96   | 2.91  | 2.53   | 56.28   | 0.17 | 0.03 | 0.05 |
| C5 Bk1  | 88.13  | 138.50 | 18.59 | 69.25  | 12.20 | 2.40  | 9.65  | 1.33  | 7.23  | 1.32  | 3.61  | 0.52 | 3.34  | 0.52 | 356.59  | 49.69  | 406.28  | 10.77 | 190.90 | 338.60  | 0.78 | 0.07 |      |
| C5 Bk2  | 178.70 | 313.40 | 39.03 | 149.10 | 28.35 | 5.65  | 22.73 | 3.37  | 18.89 | 3.56  | 9.87  | 1.47 | 9.49  | 1.50 | 785.10  | 127.5  | 912.60  | 23.02 | 47.32  | 742.00  | 1.74 | 0.11 |      |
